# Supplementary material
Source: publisher figshare collection journal article supplement (https://gsapubs.figshare.com/ndownloader/files/22410495)
Supplement: Supplementary file 1 [file 22410495]

Archive with 77 entries (56 files):
- TAFI/
- TAFI/Example_Data/
- TAFI/Example_Data/Aleutian_bath_detrended.csv
- TAFI/Example_Data/Aleutian_bathymetry_location.png
- TAFI/Example_Data/Aleutian_gravity_detrended.csv
- TAFI/Geodynamic_functions/
- TAFI/Geodynamic_functions/Geodynamic_Utilities/
- TAFI/Geodynamic_functions/Geodynamic_Utilities/DefConstant.m
- TAFI/Geodynamic_functions/Geodynamic_Utilities/flexparam.m
- TAFI/Geodynamic_functions/Geodynamic_Utilities/flexure_Callback.m
- TAFI/Geodynamic_functions/Geodynamic_Utilities/x_vector.m
- TAFI/Geodynamic_functions/Green's_functions/
- TAFI/Geodynamic_functions/Green's_functions/Continuous2D_flex.m
- TAFI/Geodynamic_functions/Green's_functions/Continuous3D_flex.m
- TAFI/Geodynamic_functions/Green's_functions/Continuous3Dgrid_flex.m
- TAFI/Geodynamic_functions/Green's_functions/Halfspace2D_flex.m
- TAFI/Geodynamic_functions/Sinusoidal/
- TAFI/Geodynamic_functions/Sinusoidal/Harmonic2D_flex.m
- TAFI/Gravity_functions/
- TAFI/Gravity_functions/gravity_Callback.m
- TAFI/Gravity_functions/parkg.m
- TAFI/Gravity_functions/parkg_3D.m
- TAFI/GUI_functions/
- TAFI/GUI_functions/Default_backups/
- TAFI/GUI_functions/Default_backups/DefConstant_bkp.m
- TAFI/GUI_functions/Default_backups/TAFI_defaults_bkp.m
- TAFI/GUI_functions/GUI_Function_Utilities/
- TAFI/GUI_functions/GUI_Function_Utilities/harmonicoff.m
- TAFI/GUI_functions/GUI_Function_Utilities/harmonicon.m
- TAFI/GUI_functions/GUI_Function_Utilities/setTAFIenv.m
- TAFI/GUI_functions/GUI_Function_Utilities/TAFI_defaults.m
- TAFI/Load_Functions/
- TAFI/Load_Functions/Convolution/
- TAFI/Load_Functions/Convolution/.DS_Store
- TAFI/Load_Functions/Convolution/loadconv2D.m
- TAFI/Load_Functions/Convolution/loadconv3D.m
- TAFI/Load_Functions/Import_Load/
- TAFI/Load_Functions/Import_Load/GridImport.fig
- TAFI/Load_Functions/Import_Load/GridImport.m
- TAFI/Load_Functions/Import_Load/ImportLoad.fig
- TAFI/Load_Functions/Import_Load/ImportLoad.m
- TAFI/Load_Functions/Load_Function_Utilities/
- TAFI/Load_Functions/Load_Function_Utilities/loadspacinginterp.m
- TAFI/Load_Functions/Load_Function_Utilities/ReadLoad2D.m
- TAFI/Load_Functions/Load_Function_Utilities/ReadLoad3D.m
- TAFI/Load_Functions/Load_Function_Utilities/rmload_Callback.m
- TAFI/LoadDemofiles/
- TAFI/LoadDemofiles/.DS_Store
- TAFI/LoadDemofiles/2-Dloaddemo.csv
- TAFI/LoadDemofiles/3-Dloaddemo.xlsx
- TAFI/LoadDemofiles/3-Dpointload-2load.xlsx
- TAFI/LoadDemofiles/3-Dpointload-demo.xlsx
- TAFI/LoadDemofiles/3Dload50.txt
- TAFI/LoadDemofiles/3Dload500.txt
- TAFI/LoadDemofiles/3Dload5000.txt
- TAFI/LoadDemofiles/Load_Readme.rtf
- TAFI/Output_Parameters/
- TAFI/Output_Parameters/numcal_xcross.m
- TAFI/Output_Parameters/outputparam.m
- TAFI/Plot_Function/
- TAFI/Plot_Function/calcindex.m
- TAFI/Plot_Function/TAFIPlot2D.m
- TAFI/Plot_Function/TAFIPlot3D.m
- TAFI/README.txt
- TAFI/TAFI.fig
- TAFI/TAFI.m
- __MACOSX/
- __MACOSX/TAFI/
- __MACOSX/TAFI/._TAFI.m
- TAFI/TAFI.mlappinstall
- TAFI/TAFI.prj
- TAFI/TAFI_Manual/
- TAFI/TAFI_Manual/TAFI_Manual.docx
- __MACOSX/TAFI/TAFI_Manual/
- __MACOSX/TAFI/TAFI_Manual/._TAFI_Manual.docx
- TAFI/TAFI_Manual/TAFI_Manual.pdf
- __MACOSX/TAFI/TAFI_Manual/._TAFI_Manual.pdf
