# Supplementary material
Source: publisher figshare collection journal article supplement (https://gsapubs.figshare.com/ndownloader/files/22410495)
Supplement: Supplementary file 1 [file 22410495 › TAFI/Example_Data/Aleutian_gravity_detrended.csv]

0	-123.862985
1	-127.9086352
2	-129.9203722
3	-133.7470005
4	-134.6250427
5	-135.4027263
6	-135.6647298
7	-136.2082231
8	-133.7556518
9	-133.7084808
10	-131.3548754
11	-131.8788866
12	-129.9200101
13	-130.0695972
14	-128.2021705
15	-127.8365278
16	-127.8697781
17	-127.5421428
18	-128.8849253
19	-126.9858046
20	-127.6661835
21	-126.7133766
22	-126.3192773
23	-125.4530325
24	-124.0827822
25	-122.4925997
26	-122.4966894
27	-120.04243
28	-120.1030303
29	-119.1769596
30	-117.7905592
31	-117.9762096
32	-116.7155119
33	-117.2397468
34	-116.3273564
35	-118.5644681
36	-118.7808949
37	-120.0390896
38	-122.3464181
39	-123.486567
40	-125.3058237
41	-126.0625199
42	-129.3229587
43	-128.1400551
44	-131.514865
45	-125.3963692
46	-117.7696695
47	-132.095446
48	-134.771126
49	-134.9544656
50	-136.1001474
51	-139.2062823
52	-139.2715081
53	-140.9542528
54	-143.3958855
55	-145.0588989
56	-147.3944757
57	-149.972338
58	-150.3907389
59	-151.3243428
60	-151.8055333
61	-151.0883935
62	-152.2458569
63	-150.3285649
64	-149.3400231
65	-148.9263421
66	-145.6550792
67	-144.7594224
68	-141.022736
69	-140.3864191
70	-138.4820944
71	-134.8556236
72	-132.5653741
73	-128.5966452
74	-126.4908981
75	-121.8607495
76	-118.4844845
77	-115.2026023
78	-110.881914
79	-106.9265413
80	-102.044483
81	-98.48311386
82	-94.69846008
83	-90.23161734
84	-85.50818556
85	-82.47911424
86	-75.41437563
87	-71.09810397
88	-67.09489965
89	-64.32584473
90	-60.00675709
91	-56.07804932
92	-53.86581169
93	-48.12662821
94	-44.6734858
95	-41.05927652
96	-38.20863112
97	-34.22551091
98	-31.85315397
99	-29.31255545
100	-25.7942924
101	-23.35531283
102	-21.0527743
103	-17.54235895
104	-16.63952548
105	-12.6410047
106	-12.00929195
107	-8.060076065
108	-4.625313557
109	-4.15198084
110	-0.764818028
111	0.971851259
112	3.160331903
113	4.853929087
114	6.319716634
115	8.646745085
116	10.10432591
117	11.74990415
118	12.67032433
119	12.92426881
120	14.38649602
121	13.93991488
122	17.09662471
123	17.83254197
124	17.40195375
125	20.06845532
126	20.17444886
127	21.8810586
128	21.58150613
129	23.15921842
130	24.29011
131	24.21497713
132	25.463833
133	25.93046491
134	27.05210607
135	27.56826572
136	28.15625256
137	29.18771033
138	30.15678361
139	30.52329089
140	30.98375831
141	31.2850277
142	31.99244386
143	33.61056827
144	32.80221075
145	32.95979157
146	33.07634478
147	33.27324763
148	33.10116443
149	33.40800238
150	36.74030543
151	35.52880897
152	35.3981893
153	35.48751647
154	35.9092974
155	36.19174114
156	36.3053901
157	37.40124394
158	37.74300902
159	39.58443262
160	38.97757188
161	41.21561681
162	38.98994724
163	41.16619071
164	39.9941674
165	41.09881074
166	43.20978901
167	42.74241218
168	43.45418322
169	42.02927299
170	44.06066113
171	42.62542328
172	42.79522274
173	43.95833465
174	42.91945958
175	44.67599488
176	43.41968758
177	44.10444532
178	43.65156027
179	44.0558619
180	45.21135605
181	44.0639883
182	46.5374455
183	46.23178989
184	47.51839564
185	46.19044795
186	45.67988498
187	46.58116936
188	46.02226114
189	45.72770715
190	46.67197476
191	46.18178426
192	45.90805816
193	45.4628522
194	46.26741714
195	46.12185047
196	46.48334065
197	47.98416748
198	46.90322109
199	47.7128426
200	48.30872694
201	48.67895075
202	49.94957065
203	50.48821
204	51.53576548
205	51.28657907
206	52.78589381
207	53.03058083
208	54.05035857
209	53.66320963
210	53.26301113
211	51.92480822
212	51.72368324
213	53.03221394
214	51.99722083
215	51.4682423
216	50.5812796
217	49.8497888
218	51.30369725
219	51.30583258
220	50.52111634
221	51.67030141
222	50.21192102
223	49.95513547
224	52.55922325
225	52.5910956
226	48.92821845
227	50.28845212
228	51.05423638
229	50.19763603
230	49.33894457
231	50.02766892
232	49.03215476
233	48.86584472
234	47.00810048
235	45.16391032
236	46.6313851
237	48.00901086
238	48.0318828
239	48.97503415
240	46.95935621
241	48.07657568
242	47.31264958
243	47.52342102
244	47.84142708
245	45.80989781
246	46.69001559
247	46.26065971
248	46.05521553
249	46.5331
250	46.15672354
251	45.4145722
252	44.9866898
253	44.71164475
254	45.25329897
255	45.92836483
256	43.91806516
257	46.0084602
258	45.18442651
259	45.65212657
260	45.72783231
261	46.40313162
262	45.99377646
263	46.71876446
264	47.24642087
265	47.20956265
266	46.2205895
267	45.66600885
268	46.09335325
269	46.57279478
270	46.04480942
271	45.59861658
272	44.49583052
273	43.72759422
274	43.99329767
275	44.68320073
276	42.8874902
277	44.35288776
278	43.17511495
279	43.88679241
280	43.8821925
281	42.83523938
282	42.42195269
283	44.84284903
284	43.0746201
285	43.67629996
286	43.87518227
287	45.08535586
288	44.66764758
289	44.64993178
290	46.0986558
291	46.04740593
292	45.59955147
293	45.62433128
294	45.84248305
295	45.80546433
296	45.85655683
297	47.05110543
298	47.04383503
299	45.06242686
300	45.71472497
301	44.38913759
302	44.18247215
303	44.51557614
304	44.2275689
305	42.79255283
306	41.79235771
307	42.75993497
308	42.92538643
309	42.97496804
310	42.96620288
311	41.70688802
312	42.14953147
313	41.72739931
314	40.74925871
315	41.13211906
316	41.4208833
317	39.05590378
318	38.82177811
319	37.20165351
320	37.10453848
321	36.71357564
322	36.89771433
323	37.0279721
324	36.89762573
325	35.08819973
326	36.42054006
327	35.34454673
328	33.95804549
329	33.18939242
330	31.9825941
331	30.95235435
332	30.72317265
333	29.58460657
334	28.44494773
335	28.93880467
336	27.34901926
337	27.49319623
338	28.26791985
339	26.92670803
340	29.93517193
341	28.32565944
342	28.23343955
343	29.71471389
344	29.51288562
345	31.43091734
346	30.72643804
347	30.47366454
348	29.47014939
349	30.24687142
350	29.65616877
351	29.51218832
352	29.56783798
353	28.67352703
354	28.49810646
355	27.51691007
356	27.85784447
357	27.17550189
358	26.4623254
359	27.05209928
360	25.72860212
361	27.73213215
362	25.20614844
363	25.96483926
364	23.29090326
365	23.42952188
366	24.97032841
367	20.5809779
368	23.43583808
369	20.79760492
370	22.22748009
371	21.91022375
372	20.74256982
373	21.61272644
374	20.0362954
375	21.37817498
376	22.09630858
377	23.4370092
378	22.78648877
379	25.03636165
380	26.19748722
381	28.13252283
382	29.95961974
383	31.92033685
384	34.58203752
385	35.08516189
386	35.36996216
387	35.90763339
388	35.79087915
389	33.24324994
390	32.9992307
391	30.55135291
392	28.37248339
393	27.92637171
394	26.138491
395	24.32908591
396	23.12735232
397	23.09261927
398	21.15080609
399	19.40105647
400	19.58107887
401	19.29523838
402	19.11258901
403	18.15432803
404	17.95727043
405	17.10258658
406	16.63178912
407	16.98953593
408	16.98844534
409	17.14730132
410	17.28423763
411	16.07123103
412	16.83887229
413	15.66549544
414	15.1777746
415	17.103293
416	17.21480289
417	16.40752077
418	15.83652086
419	16.24169578
420	17.44259667
421	18.48324329
422	18.29993858
423	19.114444
424	19.39103501
425	19.68690713
426	19.05671853
427	19.83376876
428	20.04832846
429	20.27431916
430	19.02955091
431	20.16376685
432	19.10591757
433	19.08394005
434	20.29220987
435	17.9173021
436	18.45048857
437	19.83054212
438	19.0958112
439	19.23828842
440	18.66955672
441	18.87792187
442	19.47905161
443	18.1647136
444	18.24678823
445	17.56762693
446	17.22883611
447	17.17632946
448	16.54253774
449	16.3691179
450	16.59836531
451	16.30770543
452	17.18033222
453	16.05623089
454	15.71970359
455	14.81067409
456	15.96549102
457	15.50608129
458	13.90456997
459	14.63786138
460	16.57503766
461	15.27022768
462	15.45322012
463	16.94751427
464	14.86342185
465	14.47107163
466	14.57757815
467	15.52959373
468	14.46221153
469	15.29493942
470	15.3680808
471	14.11887775
472	14.11283679
473	13.88196529
474	14.25892177
475	14.38726566
476	14.37106161
477	14.17163554
478	14.48645917
479	15.35276939
480	14.54639129
481	14.99835505
482	14.1084685
483	15.39329959
484	14.36382169
485	16.24609061
486	16.24052795
487	16.10667134
488	15.41337811
489	15.5024053
490	14.03853533
491	14.66640488
492	12.0746739
493	13.97441453
494	13.16453159
495	12.38765306
496	14.20252783
497	12.9699
498	12.79593127
499	13.07681959
500	12.93416702
501	12.09401558
502	14.2078012
503	14.04009886
504	13.40307932
505	14.88470006
506	13.53825495
507	14.13233093
508	14.11828568
509	14.91204649
510	14.73338995
511	13.80689254
512	14.13667805
513	14.19556797
514	13.93931857
515	12.98747903
516	12.94696512
517	14.02134576
518	13.24340199
519	13.48533123
520	13.68110902
521	12.44326803
522	13.37997443
523	12.95100931
524	13.49080144
525	13.2062537
526	13.66397594
527	13.01321124
528	12.11960406
529	12.4811
530	13.30985108
531	12.48309
532	13.12990089
533	12.61321251
534	13.58772667
535	13.33832954
536	12.10875908
537	12.04991177
538	13.22863784
539	12.88902068
540	12.72295719
541	12.81092552
542	11.42042328
543	12.19411617
544	14.17727537
545	13.5759979
546	14.7165543
547	14.81626591
548	15.2534566
549	15.83918647
550	16.10310798
551	17.13350335
552	17.86745263
553	17.22127225
554	17.70630919
555	17.57778937
556	17.072438
557	15.98218571
558	14.68851915
559	14.90477075
560	14.67178346
561	12.93650553
562	13.45482942
563	13.20856757
564	12.57112054
565	12.65341468
566	11.9994076
567	13.74856831
568	12.17799002
569	12.06610539
570	12.62945031
571	11.30778713
572	13.11278878
573	12.53926828
574	13.28336367
575	12.87227808
576	14.45236122
577	13.12045266
578	14.00436077
579	14.3705246
580	13.00553003
581	14.61272984
582	14.92765196
583	14.57208282
584	14.17044374
585	14.11779895
586	13.58997325
587	14.63895775
588	13.66465932
589	14.13514535
590	14.139842
591	13.72294293
592	13.80934851
593	13.14010404
594	13.57959554
595	12.51230196
596	13.20785366
597	11.80460035
598	12.30832651
599	12.99393517
600	11.44741065
601	12.87330479
602	10.82467059
603	11.49488057
604	10.77771368
605	11.20940406
606	11.16436746
607	10.51485709
608	11.91012508
609	11.11687226
610	11.34745911
611	10.29267947
612	11.34299157
613	11.18179394
614	11.15487305
615	12.10999543
616	10.46764014
617	11.48295723
618	10.966824
619	10.21419373
620	12.18527626
621	10.62426492
622	11.51566473
623	12.53599364
624	10.61414216
625	12.79351715
626	11.43253559
627	12.4885339
628	12.34800732
629	12.18642132
630	12.29440927
631	11.37983121
632	10.86700922
633	11.76138385
634	11.21061249
635	9.648270638
636	11.70699588
637	10.84923265
638	10.62168982
639	11.00599436
640	8.631687552
641	10.62573567
642	10.99665945
643	9.874180214
644	9.466195359
645	9.285125594
646	8.182192986
647	8.062316416
648	9.071441221
649	8.249577801
650	7.98156155
651	8.219660915
652	8.554012447
653	8.017142192
654	7.324999912
655	8.739794271
656	7.902349072
657	7.541759979
658	8.024505638
659	8.096919296
660	8.153460684
661	9.030166245
662	10.49787867
663	12.71059425
664	13.50434985
665	15.44787261
666	17.44411022
667	18.96911132
668	23.08589255
669	24.48320783
670	24.59415173
671	25.05637317
672	22.9683504
673	21.40398726
674	17.33586133
675	15.96530442
676	11.90936925
677	10.31680695
678	7.985501344
679	5.619202182
680	4.070655488
681	1.636476604
682	2.687836497
683	-6.125968173
684	-7.602935708
685	0.056617193
686	1.846988265
687	1.269205571
688	1.935231594
689	0.73156294
690	-3.689974438
691	-3.828784927
692	-4.600807253
693	-3.576041697
694	-4.223349859
695	-4.888598608
696	-4.091421063
697	-5.048564625
698	-5.306900602
699	-4.821290409
700	-4.106212446
701	-3.14019895
702	-3.240393076
703	-3.580182097
704	-2.551129788
705	-1.924049183
706	2.805742548
707	4.309815408
708	7.583428528
709	9.105621793
710	10.97614846
711	13.36648967
712	12.36530007
713	12.25494944
714	11.58430599
715	10.97032434
716	9.944372568
717	7.53597018
718	6.216667605
719	5.297157577
720	3.714020276
721	3.555266812
722	2.854157853
723	1.735403677
724	1.504919719
725	0.804843388
726	1.762949472
727	0.647063126
728	1.813489641
729	1.373699284
730	0.906676721
731	2.290141075
732	2.411291725
733	2.221999471
734	2.780115746
735	2.468877357
736	3.292507684
737	4.020570871
738	4.469150148
739	4.420541297
740	4.935477742
741	4.750599027
742	5.187037868
743	4.173299397
744	5.674036166
745	4.739953721
746	5.401908377
747	6.495301591
748	5.456208492
749	7.802130858
750	6.465524522
751	5.865680625
752	6.298351991
753	6.727263094
754	7.776802847
755	7.540888352
756	7.946677574
757	8.360278563
758	8.052843704
759	9.824366697
760	8.313190945
761	9.210821502
762	9.849533335
763	7.597719786
764	9.144349847
765	8.423885924
766	9.218513196
767	8.255182306
768	8.362417306
769	7.95127706
770	7.74907995
771	7.183338325
772	7.748959358
773	8.222778729
774	7.803469266
775	6.92537683
776	6.699644625
777	5.944816315
778	4.966078375
779	6.18975445
780	4.35279535
781	5.376132741
782	5.193402026
783	3.923741066
784	4.145658431
785	3.408937064
786	2.941042686
787	4.65753461
788	3.174177274
789	2.745541356
790	3.2412
791	1.830504932
792	2.464054656
793	1.548550259
794	1.687620916
795	0.927494184
796	2.481991292
797	1.550207822
798	0.988918244
799	1.113365968
800	1.906845363
801	0.795356171
802	1.650534457
803	1.853381328
804	1.45710819
805	1.481908595
806	2.301620991
807	1.982649838
808	3.336854292
809	2.107164111
810	3.392567296
811	3.120951273
812	3.250203059
813	5.083223133
814	2.367021
815	4.764958149
816	4.538052746
817	1.832380291
818	9.2833318
819	5.547551783
820	1.88141982
821	3.279920675
822	3.059414017
823	2.214891158
824	1.228645961
825	1.935598514
826	3.503105475
827	2.396238832
828	-0.328529152
829	2.920993019
830	1.890482139
831	3.399300164
832	0.778556222
833	2.305694851
834	1.878931552
835	3.400134636
836	2.225287113
837	2.905088001
838	4.428310038
839	4.339645683
840	4.197927129
841	3.0488263
842	4.388491077
843	4.967274851
844	4.278269864
845	5.751832217
846	4.345913704
847	4.992488369
848	4.69647822
849	5.593660761
850	6.193100849
851	5.35132843
852	5.954039
853	6.550349189
854	7.010037301
855	6.757449608
856	5.684073848
857	7.318536963
858	6.646928749
859	5.98646297
860	6.454722087
861	6.423975329
862	6.952050021
863	5.909892021
864	6.610946641
865	6.461172046
866	6.089505486
867	6.254235546
868	5.807050281
869	6.025268623
870	5.418514078
871	4.571000343
872	4.913985433
873	4.155226474
874	5.867923374
875	4.067114969
876	3.873667387
877	3.923032331
878	2.718642836
879	3.857626358
880	2.681808641
881	2.689528892
882	3.419856791
883	3.265897831
884	3.1866
885	3.256194233
886	2.925157276
887	2.869235538
888	3.003826137
889	3.27900703
890	4.186248694
891	1.723028374
892	3.750690439
893	2.548685997
894	3.223128667
895	4.225272467
896	2.907365728
897	3.715268417
898	3.778351421
899	2.727588897
900	4.183989568
901	2.567266182
902	2.061564278
903	3.993453987
904	2.806045484
905	4.061189871
906	3.657959622
907	4.471551459
908	3.866379828
909	4.36566621
910	4.532170073
911	5.048641156
912	5.254122805
913	5.867515802
914	6.489025675
915	5.432075061
916	5.638326087
917	4.880032932
918	5.422013598
919	5.428011206
920	4.311414359
921	4.829701774
922	4.266796619
923	3.616808766
924	4.346048165
925	3.453884832
926	4.726823261
927	4.266554987
928	3.754257022
929	3.269883785
930	3.775983812
931	3.864857362
932	5.403586241
933	5.50287027
934	5.7274802
935	4.484976043
936	5.97065711
937	5.212873814
938	5.892668055
939	5.150117436
940	5.560681622
941	5.995061193
942	5.503851888
943	7.483650923
944	6.067499758
945	5.605442402
946	6.491754559
947	5.915034781
948	7.220651263
949	5.010350779
950	6.389621917
951	6.594382479
952	6.46987413
953	6.104962039
954	5.749941479
955	6.006728394
956	5.537802994
957	5.569142256
958	5.183949485
959	5.884855824
960	5.939635367
961	5.644142583
962	6.384822669
963	5.730110963
964	6.352281533
965	5.714696051
966	5.198227851
967	5.972891846
968	5.302092638
969	4.890639201
970	5.179778518
971	5.672236351
972	4.220709246
973	3.77972021
974	4.505852363
975	3.275414726
976	4.388911331
977	2.436283673
978	3.884552041
979	3.057696661
980	2.184978726
981	3.367404906
982	3.144278707
983	3.529616838
984	2.987441346
985	2.880583567
986	2.368394853
987	2.526808156
988	2.324015545
989	1.278313247
990	1.885408385
991	1.119522454
992	0.906213133
993	0.945601329
994	1.099005434
995	1.224367781
996	1.17691897
997	0.753965109
998	1.607732972
999	0.966870026
1000	1.584730205
1001	0.494891777
1002	-0.213684356
1003	-0.004649208
1004	0.628141135
1005	-0.179232706
1006	-0.5166749
1007	-0.065289468
1008	-0.963194057
1009	-1.558178703
1010	0.353450896
1011	-0.538195163
1012	-0.045024004
1013	-0.58892794
1014	-1.322581242
1015	-1.272849868
1016	-2.302896859
1017	-1.556703606
1018	-1.676247767
1019	-3.031602857
1020	-1.753954385
1021	-2.163509994
1022	-3.024380811
1023	-3.324326343
1024	-3.913802834
1025	-2.460529179
1026	-3.791988742
1027	-4.596313265
1028	-2.473385925
1029	-3.955719253
1030	-4.021056868
1031	-4.503754607
1032	-4.448530823
1033	-3.964987944
1034	-4.767982813
1035	-5.193757748
1036	-4.106800046
1037	-5.299736692
1038	-4.791045176
1039	-5.832239445
1040	-5.287461716
1041	-5.732715786
1042	-6.220018876
1043	-3.945799211
1044	-6.683860592
1045	-5.757471508
1046	-5.487472957
1047	-3.989316534
1048	-3.782958682
1049	-3.175284288
1050	-0.511296589
1051	0.123223989
1052	1.149212277
1053	2.826860061
1054	4.1836
1055	2.956270597
1056	4.140838199
1057	4.146577736
1058	1.173297597
1059	0.159081981
1060	-1.866741952
1061	-2.870185207
1062	-3.084128598
1063	-5.572440965
1064	-4.909882465
1065	-7.475911655
1066	-6.862046693
1067	-6.107528193
1068	-8.068131807
1069	-6.82676103
1070	-7.478323357
1071	-7.103164282
1072	-6.265466366
1073	-6.829259743
1074	-6.35619543
1075	-6.28270446
1076	-6.350412143
1077	-5.57920493
1078	-6.304503839
1079	-5.915135523
1080	-5.491907776
1081	-4.128771699
1082	-3.832243589
1083	-4.2001711
1084	-4.038956007
1085	-4.689921092
1086	-4.27830399
1087	-4.717609577
1088	-3.872681627
1089	-4.428682404
1090	-4.607219274
1091	-4.313265783
1092	-4.313643022
1093	-5.007998581
1094	-3.998357975
1095	-4.818218658
1096	-4.542156074
1097	-4.490448262
1098	-4.424498539
1099	-5.560770559
1100	-4.929001219
1101	-4.964082231
1102	-3.66408416
1103	-5.623353578
1104	-3.184467987
1105	-6.109390658
1106	-4.161434845
1107	0.011387715
1108	-8.803645407
1109	-5.806397222
1110	-5.512536299
1111	-4.813386039
1112	-6.234207673
1113	-4.739345084
1114	-4.888856158
1115	-6.835018405
1116	-6.170097793
1117	-7.577333271
1118	-7.60881233
1119	-8.394571101
1120	-7.429892148
1121	-7.812167248
1122	-7.842926303
1123	-8.229411718
1124	-9.464595423
1125	-7.980985378
1126	-7.689004196
1127	-8.434903323
1128	-9.307829441
1129	-8.06619298
1130	-7.696263555
1131	-8.780798673
1132	-10.26034765
1133	-9.518007855
1134	-8.261536491
1135	-8.1943
1136	-8.856365351
1137	-7.808452833
1138	-6.719588903
1139	-8.883241344
1140	-8.82355169
1141	-9.976669074
1142	-9.63296964
1143	-10.33207949
1144	-10.42849662
1145	-11.39291374
1146	-11.03506997
1147	-11.66707438
1148	-11.94971221
1149	-11.82630217
1150	-13.04439172
1151	-12.2954109
1152	-12.79164621
1153	-13.18627943
1154	-13.73369451
1155	-14.08071667
1156	-13.20475031
1157	-13.79370234
1158	-13.54215238
1159	-14.12700923
1160	-14.73879971
1161	-14.57435741
1162	-14.15361117
1163	-13.9842089
1164	-14.91036079
1165	-13.22348979
1166	-13.94921788
1167	-15.45169111
1168	-12.73454073
1169	-15.1739356
1170	-14.03090342
1171	-13.6233537
1172	-13.34398931
1173	-13.20509901
1174	-11.96771981
1175	-12.09114732
1176	-10.59561343
1177	-11.90439286
1178	-10.91605253
1179	-11.27090494
1180	-11.61047531
1181	-10.90751148
1182	-10.1609444
1183	-10.54557439
1184	-9.938192963
1185	-9.612893482
1186	-9.27902308
1187	-10.70230055
1188	-9.681359324
1189	-8.826822756
1190	-9.084336319
1191	-9.581203078
1192	-8.884397557
1193	-9.254526064
1194	-8.792806556
1195	-9.425501363
1196	-9.820560064
1197	-9.06072421
1198	-7.617556023
1199	-8.78115625
1200	-7.975592894
1201	-7.589059317
1202	-7.830825377
1203	-7.088232236
1204	-8.065697003
1205	-7.39791634
1206	-8.005898626
1207	-7.426447216
1208	-5.288810242
1209	-6.243545615
1210	-6.456407773
1211	-6.543642782
1212	-6.254955005
1213	-6.950945408
1214	-7.467204458
1215	-6.694881824
1216	-6.22119869
1217	-6.284815687
1218	-6.864292434
1219	-7.14587721
1220	-6.899022722
1221	-7.570943763
1222	-8.864480551
1223	-7.932108979
1224	-8.142380966
1225	-8.339442765
1226	-7.940583841
1227	-8.978052052
1228	-9.341703455
1229	-9.441296923
1230	-9.790481256
1231	-8.671068085
1232	-8.981336272
1233	-10.18541207
1234	-9.842165363
1235	-9.375605027
1236	-9.842138728
1237	-9.042426745
1238	-8.892528698
1239	-8.412625921
1240	-9.084542138
1241	-8.123861584
1242	-7.370364494
1243	-6.163641207
1244	-2.908089588
1245	-2.994748444
1246	-0.947466648
1247	-1.047814655
1248	-1.435001104
1249	-1.025565546
1250	-2.441479395
1251	-4.173607427
1252	-3.828671616
1253	-5.646285498
1254	-6.118743847
1255	-6.557459706
1256	-9.10809057
1257	-8.033530821
1258	-9.998214625
1259	-9.090989968
1260	-9.487925223
1261	-9.90339949
1262	-8.561749822
1263	-10.49767245
1264	-9.718882763
1265	-10.11045465
1266	-10.55491303
1267	-10.8934154
1268	-11.03818458
1269	-11.35847679
1270	-11.10978136
1271	-11.93392136
1272	-10.84896408
1273	-11.64572487
1274	-11.67884969
1275	-12.52366028
1276	-12.92613756
1277	-13.05900051
1278	-13.01482716
1279	-12.92283085
1280	-13.5580307
1281	-12.95311658
1282	-14.33084812
1283	-14.98479672
1284	-14.3793056
1285	-16.05606773
1286	-16.23068216
1287	-16.32279187
1288	-17.94065636
1289	-18.74398418
1290	-18.06863939
1291	-19.77673601
1292	-20.08062856
1293	-20.40399392
1294	-22.1453793
1295	-22.88128384
1296	-23.84524861
1297	-24.45995984
1298	-24.14605516
1299	-24.65693744
1300	-26.39726395
1301	-26.2151876
1302	-26.21669978
1303	-28.35579218
1304	-27.39699556
1305	-29.72492562
1306	-29.37802947
1307	-30.23202459
1308	-30.95847257
1309	-32.31224709
1310	-32.43693998
1311	-32.60731179
1312	-33.09596188
1313	-32.23723283
1314	-33.47136464
1315	-32.50922928
1316	-30.62069729
1317	-29.89647601
1318	-29.39901908
1319	-28.53472918
1320	-26.07988099
1321	-26.69713849
1322	-25.73155015
1323	-24.66254184
1324	-23.92955508
1325	-24.61363311
1326	-22.41038431
1327	-24.03397757
1328	-23.53614187
1329	-23.0360684
1330	-21.68625139
1331	-21.39193956
1332	-20.69159412
1333	-20.09474051
1334	-20.51931089
1335	-18.12560161
1336	-17.9389598
1337	-18.53928331
1338	-15.35942339
1339	-14.31832106
1340	-14.37897766
1341	-13.3576816
1342	-11.372936
1343	-10.42190578
1344	-8.926608047
1345	-8.34376263
1346	-7.577425595
1347	-6.025623675
1348	-3.576085864
1349	-2.870713995
1350	-0.503926283
1351	-1.219172585
1352	0.470235408
1353	0.629632164
1354	0.203722485
1355	1.757761513
1356	1.949399408
1357	1.508209983
1358	0.888259722
1359	1.561409461
1360	1.403420063
1361	1.027792796
1362	-0.023097422
1363	0.566080941
1364	-0.442225247
1365	-0.355701626
1366	-0.519977542
1367	-1.919836281
1368	-0.765025531
1369	-0.226079071
1370	-2.998801919
1371	-2.192377911
1372	-2.806035478
1373	-2.29685792
1374	-1.670974113
1375	-2.756009536
1376	-3.404735524
1377	-2.046756684
1378	-5.627771983
1379	-0.27547144
1380	-3.412230839
1381	-2.281488602
1382	-1.479539883
1383	-3.650435309
1384	1.359886323
1385	-2.68305091
1386	-1.570045289
1387	-1.594427284
1388	-0.385948309
1389	-0.437415626
1390	0.646113248
1391	0.042978349
1392	1.363676608
1393	2.170795419
1394	2.541006091
1395	2.324343107
1396	2.6170997
1397	3.05534825
1398	4.127543234
1399	1.625688382
1400	3.685200096
1401	4.103855649
1402	4.265756364
1403	5.232453407
1404	5.939237152
1405	6.420116779
1406	4.807353623
1407	6.533966152
1408	3.81396198
1409	2.129941287
1410	1.366056543
1411	-1.788189826
1412	-1.651629457
1413	-2.734021669
1414	-3.003503864
1415	-3.162931228
1416	-4.124163332
1417	-4.812015096
1418	-6.511127903
1419	-5.648081548
1420	-5.078517678
1421	-6.774523967
1422	-4.961094701
1423	-7.06879971
1424	-5.655579523
1425	-5.509556066
1426	-4.283482251
1427	-5.832737561
1428	-4.769526081
1429	-3.954210293
1430	-4.829884954
1431	-4.598371563
1432	-4.847780095
1433	-5.56058381
1434	-6.194328221
1435	-6.084086785
1436	-6.964356548
1437	-6.305544546
1438	-7.603985297
1439	-7.3879
1440	-7.192290727
1441	-8.651613571
1442	-7.810361865
1443	-8.527114498
1444	-8.126244572
1445	-9.087417967
1446	-8.960235868
1447	-9.917433508
1448	-9.745645545
1449	-9.104869496
1450	-9.06769626
1451	-9.787126194
1452	-9.351545329
1453	-10.17307992
1454	-10.25461068
1455	-10.37860771
1456	-11.0165244
1457	-11.09548868
1458	-11.61485098
1459	-12.38624097
1460	-11.1850392
1461	-11.74710326
1462	-12.23063303
1463	-12.63011279
1464	-12.01504223
1465	-10.06846447
1466	-12.65662903
1467	-12.81516605
1468	-12.81061777
1469	-12.87592216
1470	-11.6226871
1471	-12.17098039
1472	-13.27103869
1473	-12.44892592
1474	-14.32844182
1475	-13.84504963
1476	-13.81479116
1477	-14.0244611
1478	-13.30489705
1479	-14.40870722
1480	-14.51097472
1481	-15.30775196
1482	-13.84815666
1483	-14.48298438
1484	-13.95980676
1485	-13.75643418
1486	-14.75436201
1487	-14.55177716
1488	-14.9333283
1489	-14.22063278
1490	-15.82156433
1491	-14.3558612
1492	-13.49839728
1493	-13.53174245
1494	-13.64378767
1495	-12.16088245
1496	-12.22036284
