# Supplementary material
Source: publisher figshare collection journal article supplement (https://gsapubs.figshare.com/ndownloader/files/22410495)
Supplement: Supplementary file 1 [file 22410495 › TAFI/Geodynamic_functions/Green's_functions/Continuous2D_flex.m]

% [wgreen] = Continuous2D_flex(alpha,D,x)
%
% Computes the 2D Green's function for a continuous elastic plate under
% 2D line load (Continous plate model)
%
% RETURN
%  wgreen = vector containing discretized Green's function
% ARGUMENTS
%  All arguments are provided in SI units
%  alpha = flexural parameter (Unit- meters)
%  D = flexural rigidity (Unit - Newton-meter)
%  x = vector of positions at which to calculate Green's function (Unit -
%  meter)

% TAFI - Toolbox for Analysis of Flexural Isostasy
% Programmed by S. Jha

function [wgreen]= Continuous2D_flex(alpha,D,x)

% Initialize empty Green's Function
nx=length(x);
wgreen = zeros(1, nx);

% Compute Green's Function
for i = 1:1:nx
    xda=x(i)/alpha;
    wgreen(i) = (alpha^3)/(8*D)*exp(-xda)*(cos(xda)+sin(xda));
end
