# Supplementary material
Source: publisher figshare collection journal article supplement (https://gsapubs.figshare.com/ndownloader/files/22410495)
Supplement: Supplementary file 1 [file 22410495 › TAFI/LoadDemofiles/Load_Readme.rtf]

TAFI - Toolbox for Analyzing Flexural IsostasyLoad Demo Folder README******************************************************************The text (*.txt, *.csv) and Excel (*.xlsx, *.xls) files provided in this folder are to help the user understand the flexural deformation using varied loadshapes. 1. 2D Line Load		——				2-Dloaddemo.csv2. Point Load			—- 				3Dpointload-demo.xlsx3. 2 Point Loads on adjacent grids	——		3Dpointload-2closeload.xlsx4. 2 Point Loads randomly placed in the grid —— 	3Dpointload-2loads.xlsx5. 3D line load of length 50 km —— 			3Dload50.txt6. 3D line load of length 500 km —— 			3Dload500.txt7. 3D line load of length 5000 km —— 			3Dload5000.txtThe load magnitudes for all loads is kept at 1e8 N/m^2.The line load is distributed over 131 km with spacing (del X) = 1 km.All the point loads are distributed within 131 x 74 km grid, with del X and del Y at 1 km each.3D line loads of length 50 km, 500 km, and 5000 km consists of 100 x 50, x500, x5000 km grid.The position of the load application and extent of the grid can be checked out from Utilities>Plot Imported load menu in TAFI.
