# Supplementary material
Source: publisher figshare collection journal article supplement (https://gsapubs.figshare.com/ndownloader/files/22410495)
Supplement: Supplementary file 1 [file 22410495 › TAFI/TAFI.prj]

<deployment-project plugin="plugin.apptool" plugin-version="1.0">
  <configuration build-checksum="2816171961" file="C:\Users\Sumant Jha\Google Drive\Geosphere\Review_done\Review2\TAFI_2017\TAFI\TAFI.prj" location="C:\Users\Sumant Jha\Google Drive\Geosphere\Review_done\Review2\TAFI_2017\TAFI" name="TAFI" target="target.mlapps" target-name="Package App">
    <param.appname>TAFI</param.appname>
    <param.authnamewatermark>Sumant Jha</param.authnamewatermark>
    <param.email>sumantjha02@gmail.com</param.email>
    <param.company>Colorado State University</param.company>
    <param.icon />
    <param.icons />
    <param.summary>Toolbox for Analysis of Flexural Isostasy (TAFI)</param.summary>
    <param.description>This is the first version of the toolbox. So, there might still be some bugs in it. Do not hesitate to contact me in case you run into any issue.</param.description>
    <param.screenshot />
    <param.version>1.0</param.version>
    <param.products.name />
    <param.products.id />
    <param.products.version />
    <param.platforms />
    <param.output>C:\Users\Sumant Jha\Google Drive\Geosphere\Review_done\Review2\TAFI_2017\TAFI</param.output>
    <param.guid>eb08df43-e630-4a82-9e5e-a23d0141cec8</param.guid>
    <unset>
      <param.icon />
      <param.icons />
      <param.screenshot />
      <param.version />
      <param.products.name />
      <param.products.id />
      <param.products.version />
      <param.platforms />
      <param.output />
    </unset>
    <fileset.main>
      <file>${PROJECT_ROOT}\TAFI.m</file>
    </fileset.main>
    <fileset.depfun>
      <file>${PROJECT_ROOT}\Example_Data\Aleutian_bath_detrended.csv</file>
      <file>${PROJECT_ROOT}\Example_Data\Aleutian_bathymetry_location.png</file>
      <file>${PROJECT_ROOT}\Example_Data\Aleutian_gravity_detrended.csv</file>
      <file>${PROJECT_ROOT}\Geodynamic_functions\Geodynamic_Utilities\DefConstant.m</file>
      <file>${PROJECT_ROOT}\Geodynamic_functions\Geodynamic_Utilities\flexparam.m</file>
      <file>${PROJECT_ROOT}\Geodynamic_functions\Geodynamic_Utilities\flexure_Callback.m</file>
      <file>${PROJECT_ROOT}\Geodynamic_functions\Geodynamic_Utilities\x_vector.m</file>
      <file>${PROJECT_ROOT}\Geodynamic_functions\Green's_functions\Continuous2D_flex.m</file>
      <file>${PROJECT_ROOT}\Geodynamic_functions\Green's_functions\Continuous3D_flex.m</file>
      <file>${PROJECT_ROOT}\Geodynamic_functions\Green's_functions\Continuous3Dgrid_flex.m</file>
      <file>${PROJECT_ROOT}\Geodynamic_functions\Green's_functions\Halfspace2D_flex.m</file>
      <file>${PROJECT_ROOT}\Geodynamic_functions\Sinusoidal\Harmonic2D_flex.m</file>
      <file>${PROJECT_ROOT}\Gravity_functions\gravity_Callback.m</file>
      <file>${PROJECT_ROOT}\Gravity_functions\parkg.m</file>
      <file>${PROJECT_ROOT}\Gravity_functions\parkg_3D.m</file>
      <file>${PROJECT_ROOT}\GUI_functions\Default_backups\DefConstant_bkp.m</file>
      <file>${PROJECT_ROOT}\GUI_functions\Default_backups\TAFI_defaults_bkp.m</file>
      <file>${PROJECT_ROOT}\GUI_functions\GUI_Function_Utilities\harmonicoff.m</file>
      <file>${PROJECT_ROOT}\GUI_functions\GUI_Function_Utilities\harmonicon.m</file>
      <file>${PROJECT_ROOT}\GUI_functions\GUI_Function_Utilities\setTAFIenv.m</file>
      <file>${PROJECT_ROOT}\GUI_functions\GUI_Function_Utilities\TAFI_defaults.m</file>
      <file>${PROJECT_ROOT}\Load_Functions\Convolution\loadconv2D.m</file>
      <file>${PROJECT_ROOT}\Load_Functions\Convolution\loadconv3D.m</file>
      <file>${PROJECT_ROOT}\Load_Functions\Import_Load\GridImport.fig</file>
      <file>${PROJECT_ROOT}\Load_Functions\Import_Load\GridImport.m</file>
      <file>${PROJECT_ROOT}\Load_Functions\Import_Load\ImportLoad.fig</file>
      <file>${PROJECT_ROOT}\Load_Functions\Import_Load\ImportLoad.m</file>
      <file>${PROJECT_ROOT}\Load_Functions\Load_Function_Utilities\loadspacinginterp.m</file>
      <file>${PROJECT_ROOT}\Load_Functions\Load_Function_Utilities\ReadLoad2D.m</file>
      <file>${PROJECT_ROOT}\Load_Functions\Load_Function_Utilities\ReadLoad3D.m</file>
      <file>${PROJECT_ROOT}\Load_Functions\Load_Function_Utilities\rmload_Callback.m</file>
      <file>${PROJECT_ROOT}\LoadDemofiles\2-Dloaddemo.csv</file>
      <file>${PROJECT_ROOT}\LoadDemofiles\3-Dloaddemo.xlsx</file>
      <file>${PROJECT_ROOT}\LoadDemofiles\3-Dpointload-2load.xlsx</file>
      <file>${PROJECT_ROOT}\LoadDemofiles\3-Dpointload-demo.xlsx</file>
      <file>${PROJECT_ROOT}\LoadDemofiles\3Dload50.txt</file>
      <file>${PROJECT_ROOT}\LoadDemofiles\3Dload500.txt</file>
      <file>${PROJECT_ROOT}\LoadDemofiles\3Dload5000.txt</file>
      <file>${PROJECT_ROOT}\LoadDemofiles\Load_Readme.rtf</file>
      <file>${PROJECT_ROOT}\Output_Parameters\numcal_xcross.m</file>
      <file>${PROJECT_ROOT}\Output_Parameters\outputparam.m</file>
      <file>${PROJECT_ROOT}\Plot_Function\calcindex.m</file>
      <file>${PROJECT_ROOT}\Plot_Function\TAFIPlot2D.m</file>
      <file>${PROJECT_ROOT}\Plot_Function\TAFIPlot3D.m</file>
      <file>${PROJECT_ROOT}\TAFI.fig</file>
      <file>${PROJECT_ROOT}\TAFI_Manual\TAFI_Manual.docx</file>
      <file>${PROJECT_ROOT}\TAFI_Manual\TAFI_Manual.pdf</file>
    </fileset.depfun>
    <fileset.resources>
      <file>${PROJECT_ROOT}\Example_Data</file>
      <file>${PROJECT_ROOT}\Geodynamic_functions</file>
      <file>${PROJECT_ROOT}\Gravity_functions</file>
      <file>${PROJECT_ROOT}\GUI_functions</file>
      <file>${PROJECT_ROOT}\Load_Functions</file>
      <file>${PROJECT_ROOT}\LoadDemofiles</file>
      <file>${PROJECT_ROOT}\Output_Parameters</file>
      <file>${PROJECT_ROOT}\Plot_Function</file>
      <file>${PROJECT_ROOT}\README.txt</file>
      <file>${PROJECT_ROOT}\TAFI_Manual</file>
    </fileset.resources>
    <fileset.package />
    <build-deliverables>
      <file location="C:\Users\Sumant Jha\Google Drive\Geosphere\Review_done\Review2\TAFI_2017" name="TAFI" optional="false">C:\Users\Sumant Jha\Google Drive\Geosphere\Review_done\Review2\TAFI_2017\TAFI</file>
    </build-deliverables>
    <workflow />
    <matlab>
      <root>C:\Program Files\MATLAB\R2016a</root>
      <toolboxes />
    </matlab>
    <platform>
      <unix>false</unix>
      <mac>false</mac>
      <windows>true</windows>
      <win2k>false</win2k>
      <winxp>false</winxp>
      <vista>false</vista>
      <linux>false</linux>
      <solaris>false</solaris>
      <osver>6.2</osver>
      <os32>false</os32>
      <os64>true</os64>
      <arch>win64</arch>
      <matlab>true</matlab>
    </platform>
  </configuration>
</deployment-project>
