# Supplementary material
Source: publisher figshare collection journal article supplement (https://gsapubs.figshare.com/ndownloader/files/22410495)

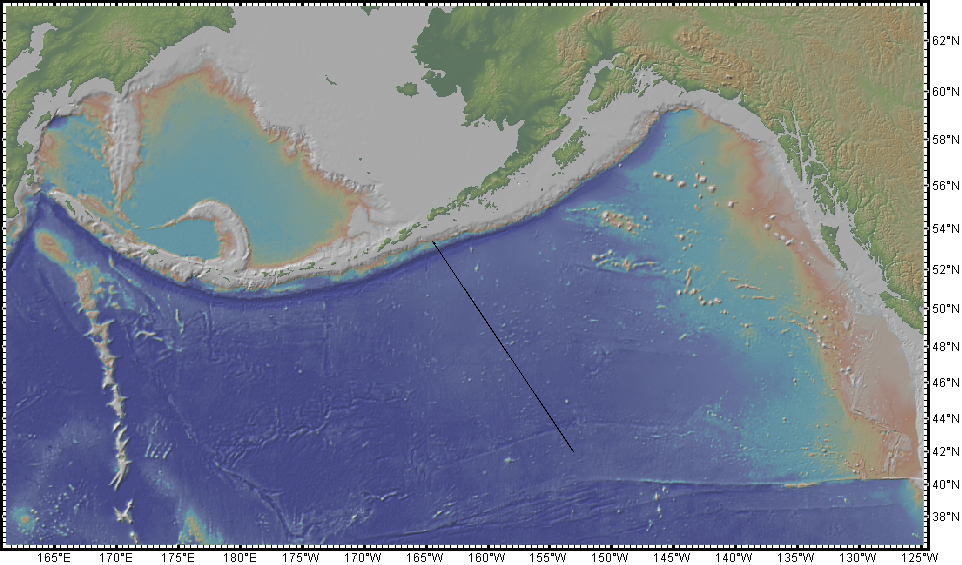

Supplement: Supplementary file 1 [file 22410495 › TAFI/Example_Data/Aleutian_bathymetry_location.png]
